# Supplementary material for: Narrow size distribution of lysozyme crystals in a reverse vapor diffusion set-up
Source: Royal Society of Chemistry journal article supplement (doi:10.1039/d2ce01510b), 2023-01-01
Supplement: d2ce01510b1.pdf [file d2ce01510b1.pdf]

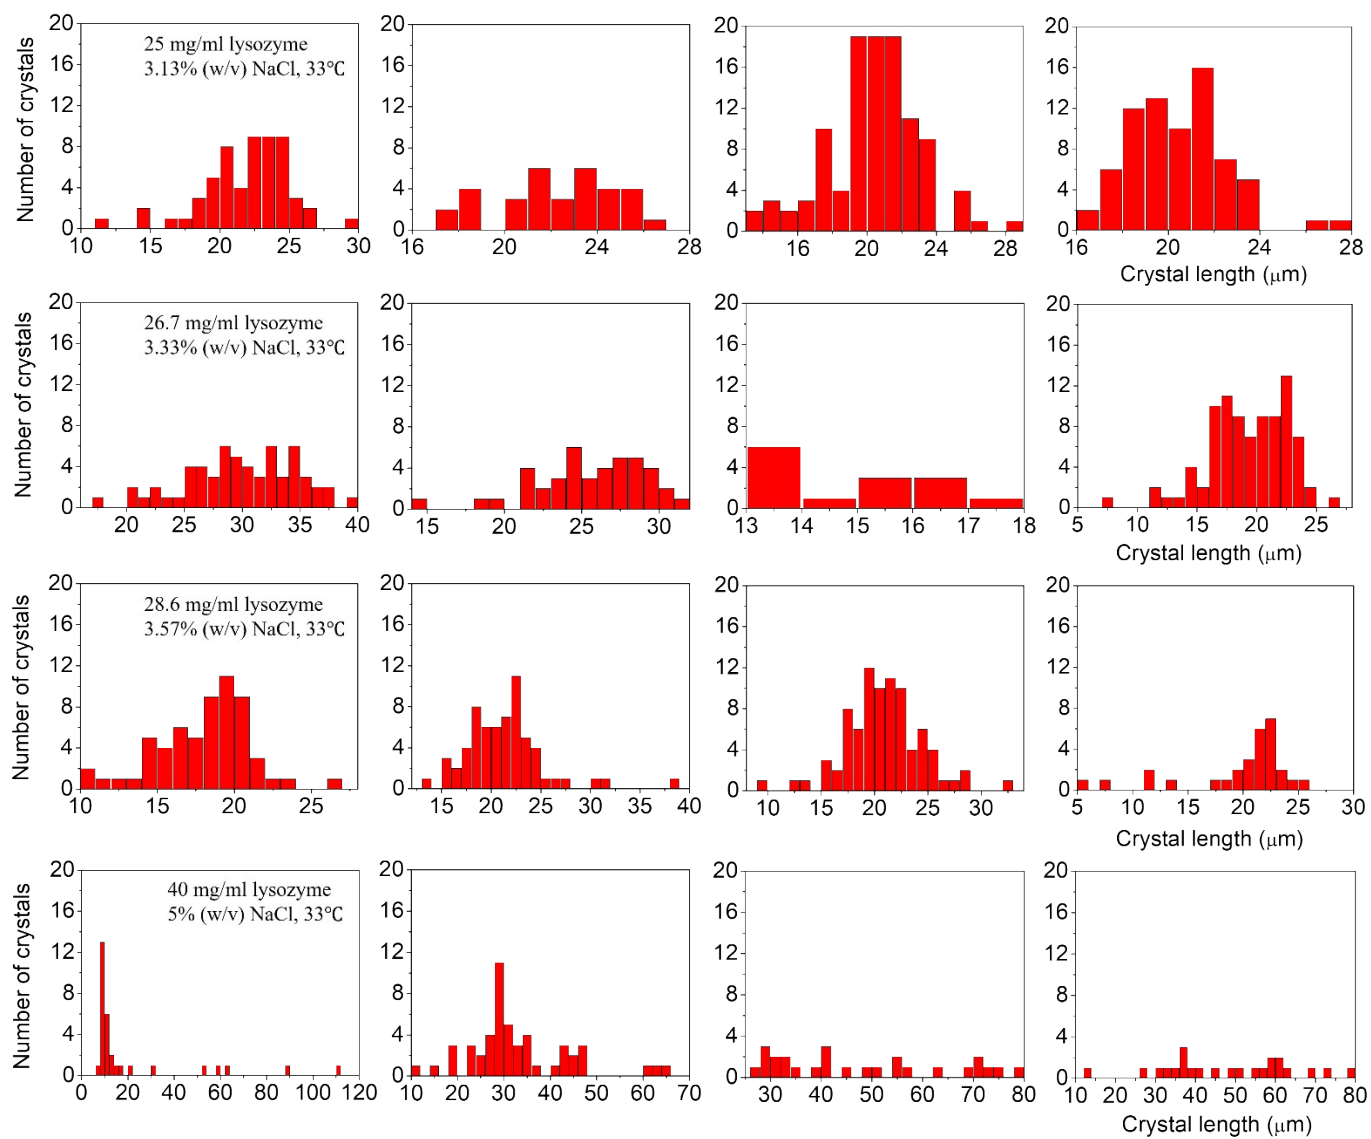

**Figure S2.** Frequency distribution of the lysozyme crystal length. The bin size is 1 μm for the first three rows of histograms and 2 μm for the last row. The histograms are based on the data, shown in Figure 6.
