# Supplementary material for: Narrow size distribution of lysozyme crystals in a reverse vapor diffusion set-up
Source: Royal Society of Chemistry journal article supplement (doi:10.1039/d2ce01510b), 2023-01-01
Supplement: d2ce01510b2.pdf [file d2ce01510b2.pdf]

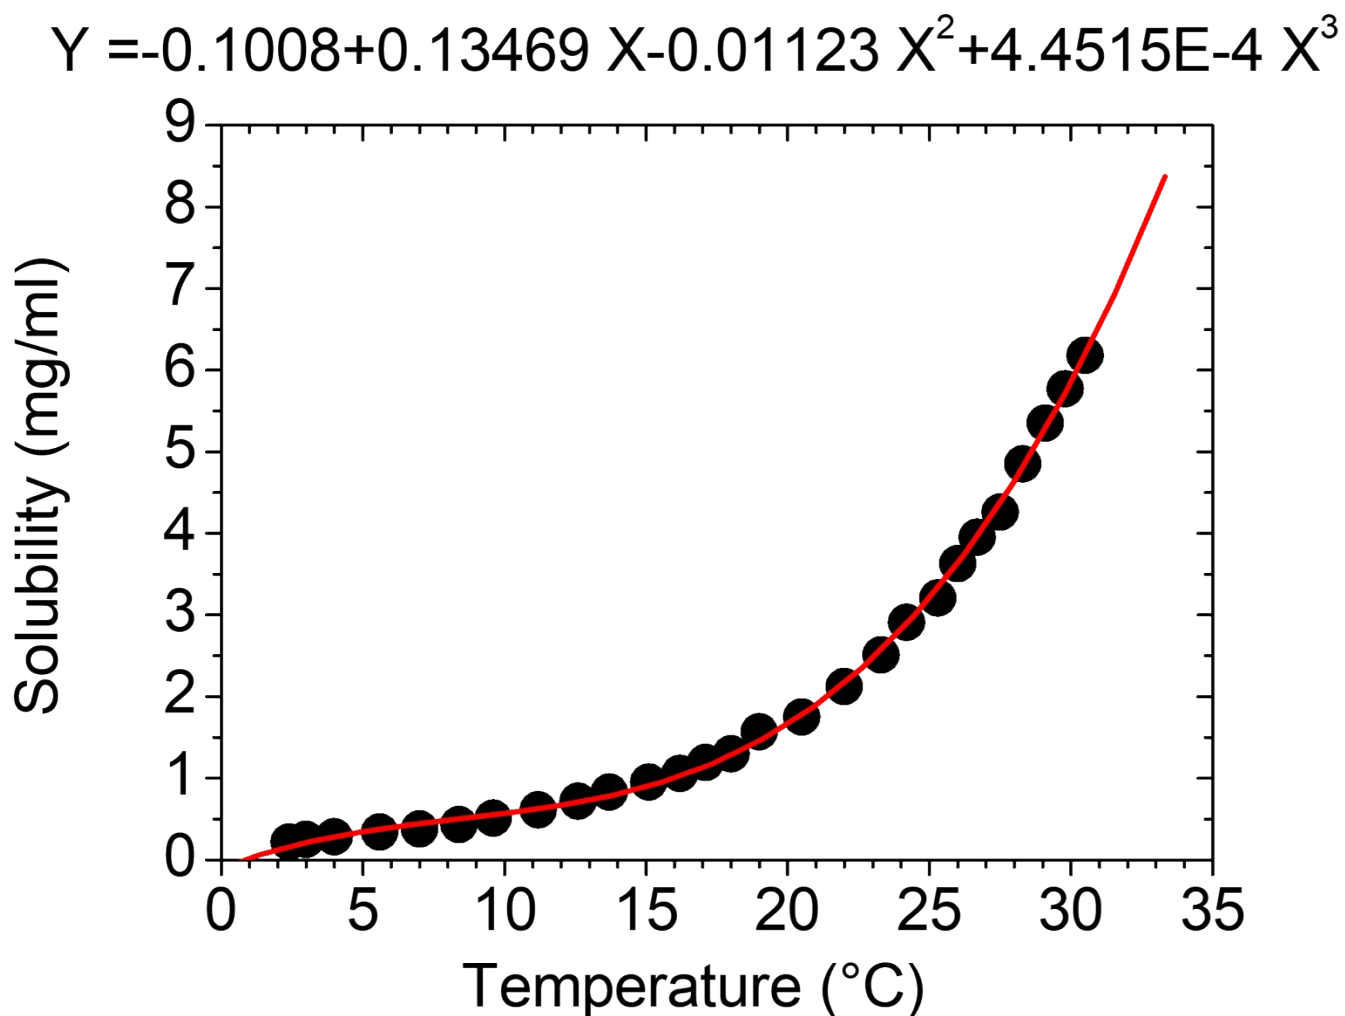

**Figure S1.** Third order polynomial fit (see [18]) to the lysozyme temperature-dependent solubility in 5% (w/v) NaCl, 0.1 M sodium acetate buffer with pH=4.0 [21] (black circles). The obtained coefficients of the polynomial are shown. The lysozyme solubility at 33 °C is 8.1 mg ml<sup>-1</sup>.
